# Supplementary material for: Exploring quadriceps activity variations in women: the role of seated posture during stair climbing
Source: PeerJ. 2024 Nov 22;12:e18547. doi: 10.7717/peerj.18547 (PMC11587870; doi:10.7717/peerj.18547)
Supplement: Supplemental Information 2 [file peerj-12-18547-s002.xlsx]

## Sheet: Sheet2
no	gender	group	higth	kg	D_leg	age	신체활동설문	iq	실제	PER_VM_UP_%MVIC	PER_RF_UP_%MVIC	PER_VL_UP_%MVIC	PER_VM_DOWN_%MVIC	PER_RF_DOWN_%MVIC	PER_VL_DOWN_%MVIC	POST_VM_UP_%MVIC	POST_RF_UP_%MVIC	POST_UP_VL_%MVIC	POST_VM_DOWN_%MVIC	POST_RF_DOWN_%MVIC	POST_VL_DOWN_%MVIC
1	2	2	167	55	1	20	2	4071	3	94.0217	57.4273	70.7722	38.4328	40.9396	35.3086	92.029	9999	49.3827	60.8696	29.9553	31.8981
3	2	3	156	50	1	21	2	2853	2	87.1508	34.9311	70.7722	73.1844	22.3124	41.139	88.0819	48.7289	83.0116	34.2272	27.1669	45.9653
6	2	2	159	62	1	24	2	5484	3	9999	42.4545	99.3506	60.2128	25.0455	59.1342	9999	53.6818	82.684	66.0638	39.1591	60.5411
7	2	2	164	53	1	28	2	1506	2	80.4082	26.9276	39.4677	53.6054	17.5245	43.3226	52.381	21.1057	41.4194	32.4898	15.2838	35.2097
10	2	3	164	49	1	23	3	2655	2	59.0219	15.2218	78.2027	62.0742	21.0444	47.782	33.3727	19.8614	81.6444	29.3592	19.4362	41.4149
12	2	3	155	48	1	20	2	231	1	52.1112	25.3123	86.2969	39.8558	18.1565	52.9364	51.8023	22.1294	76.1827	39.6498	15.8916	50.9951
16	2	1	162	52	1	21	2	831	2	68.9373	59.3821	99.8997	67.1662	37.3333	44.4333	46.8937	68.4553	48.6459	35.7221	32.813	23.1394
17	2	1	157	50	1	19	2	10398	3	90.5967	21.6839	9999	36.1844	10.013	63.7572	75.0452	40.2332	93.4489	36.1844	23.6917	44.4509
18	2	1	174	67	1	20	2	4158	3	89.3013	58.4008	9999	74.476	42.166	74.6934	89.3013	66.6194	9999	37.8821	28.7045	49.0486
20	2	1	174	64	1	21	2	2311	2	9999	49.6275	49.7711	71.224	30.4011	28.1866	67.6443	29.7421	50.4577	41.8938	31.6619	29.6303
27	2	2	163	48	1	21	2	1311	2	67.9474	42.696	71.844	42.8716	15.9976	33.8298	70.4752	40.1425	73.3333	38.3215	12.9097	25.8865
28	2	2	167	60	1	29	2	1920	2	53.5342	94.9495	66.3009	55.2723	79.5735	34.5455	60.8343	9999	87.3041	75.0869	96.4085	71.7868
29	2	3	166	53	2	21	3	2151	2	70.2899	44.9887	72.8833	77.5362	62.0328	57.0938	77.5362	65.0623	92.7918	9999	71.1495	52.0595
32	2	1	166	63	1	22	3	3306	2	52.7228	32.5939	47.4495	47.5248	25.8451	35.7074	55.9406	35.7394	56.8816	50.9901	23.4507	39.2685
34	2	2	165	50	1	19	2	2118	2	60.3306	27.1668	82.4415	39.8209	9.74404	34.5819	58.2645	27.0168	70.5686	40.6474	11.3769	39.2809
36	2	3	161	60	1	24	2	2910	2	94.2636	61.9196	9999	52.2997	43.3036	46.1282	90.4393	49.5536	9999	53.385	38.4598	46.6154
39	2	2	164	48	1	23	3	7653	3	93.8776	9999	9999	75.6122	92.6646	9999	98.9796	9999	9999	76.6071	88.5893	92.2594
44	2	3	165	50	1	21	2	4551	3	58.0222	60.2342	83.8313	32.3105	36.4403	50.5975	56.8946	83.6768	98.7698	33.6414	45.9719	51.7223
45	2	2	164	59	1	21	2	693	2	44.3461	12.1946	33.2989	21.8879	9.53098	20.8687	43.0678	14.1922	40.3309	25.1721	10.8107	23.8469
46	2	3	160	50	1	22	2	1386	2	29.8975	24.2781	54.0895	18.303	12.2246	31.713	26.1617	23.2193	60.6481	18.918	13.1123	34.2593
48	2	2	167	60	1	21	2	1188	2	52.6897	69.7917	60.8343	34.9241	50.7986	37.1147	55.8621	89.4097	69.5249	37.3241	49.566	38.8181
49	2	1	158	67	1	21	2	231	1	38.2816	21.2612	70.5193	24.5465	16.2612	41.0385	40.7518	26.5625	75.3769	23.9737	17.5893	39.6315
52	2	3	161	70	1	24	2	9798	3	68.2243	43.9024	9999	42.0694	32.5915	53.6885	59.9466	46.3872	9999	34.6595	37.5762	43.0328
54	2	1	160	52	1	22	2	3555	3	79.8507	34.7723	77.8135	9999	28.2505	40.7288	57.9602	26.7909	68.4887	26.0199	29.7101	39.9786
55	2	1	165	60	1	21	2	2226	2	9999	9999	63.6998	9999	64.933	42.3386	71.7054	9999	82.3735	48.2171	50.5134	41.3787
56	2	1	169	51	1	23	2	792	2	84.2784	37.9531	78.2552	48.067	25.8422	55.4688	78.6082	46.162	77.474	43.8144	41.8977	53.776
57	2	2	168	80	1	22	2	2433	2	95.4911	41.0762	42.4008	55.3945	27.6682	25.547	91.4654	45.7698	47.241	47.81	27.728	27.8316
58	2	3	167	55	1	20	2	924	2	71.746	33.7273	63.2768	66.873	36.8333	40.8333	60.4762	33.5455	63.7006	27.0952	18.1212	34.209
4	2	1	161	53	1	23	2	1546	2	9999	51.3163	97.2194	90.2454	61.9958	82.0153	9999	58.4501	9999	82.0859	43.3333	76.6071
	2	3	152	48	1	23	2	231	1	72.4679	46.8293	73.271	53.7803	31.187	42.4673	65.4779	56.439	75.1402	44.0656	47.0894	50.0935
